# Supplementary material
Source: Royal Society of Chemistry journal article supplement (doi:10.1039/d5em01004g)
Supplement: d5em01004g1.pdf [file d5em01004g1.pdf]

Supporting Information for

**Visible radiation-driven photomineralization and photoproduction of dissolved organic matter in a large estuary: Implications for coastal ocean biogeochemical cycles**

Guisheng Song<sup>1\*</sup>, Fuxin Niu<sup>2</sup>, Yao Gong<sup>2</sup>, Philippe Massicotte<sup>3</sup>, Han Zuo<sup>1</sup>, Mengting Li<sup>1</sup>,  
Huixiang Xie<sup>4\*</sup>

<sup>1</sup>Tianjin Key Laboratory for Marine Environmental Research and Service, School of Marine Science and Technology, Tianjin University, Tianjin, China;

<sup>2</sup>Tianjin Ocean Center, Ministry of Natural Resources, Tianjin, China;

<sup>3</sup>CNRS – Université Laval – Sorbonne Université – Laboratoire de recherche international Takuvik, Québec, Canada;

<sup>4</sup>Institut des sciences de la mer, Université du Québec à Rimouski, Rimouski, Québec, Canada.

\*Corresponding authors: G. Song (guisheng.song@tju.edu.cn) and H. Xie (huixiang\_xie@uqar.ca)

**Contents of this file**

**Text S1.** Fraction of photons absorbed by CDOM in the water column

**Text S2.** Modelling depth-resolved VIS-induced photoproduction of protein-like FDOM and CO<sub>2</sub> in the water column

**Figure S1.** Measured spectral irradiances of the solar simulator for three light treatments: no extra light screening (i.e., full spectrum, FS), screened by the Mylar-D filter (UVB excluded), and screened by the UF-5 Plexiglas filter (both UVA and UVB excluded). Also shown is the monthly-averaged clear-sky noontime solar irradiance spectrum in January 2016 at 22.5°N derived from the SMARTS2 model.<sup>1,2</sup>

**Figure S2.** Plots of C2 versus C1 (A) and C4 versus C3 (B).

**Figure S3.**  $a_t$  (A) and percent of light absorbed by sample (B) in the irradiation vessel as a function of wavelength for the original water samples.

**Figure S4.** Typical absorption coefficients of particles versus SPM concentration based on samples collected in July 2013 (A); the retrieved absorption spectra of particles

(B); and the calculated fraction of photons absorbed by CDOM (C) at Sta. M01, M08 and M10 in January 2016.

**Figure S5.** Modelled VIS-induced monthly photoproduction of protein-like FDOM (A) and CO<sub>2</sub> (B) in the water column in January 2016.

**Table S1.** The input conditions for modelling the surface solar irradiance at 22.5°N in January 2016 over the PRE.

**Table S2.** *p* values of one-tailed t-tests for comparing the irradiated sample and the parallel dark control under FS, UVA+VIS and VIS.

**Table S3.** *p* values of two-tailed t-tests for comparing samples irradiated under FS, UVA+VIS and VIS.

**Table S4.** *p* values of two-tailed t-tests for comparing samples irradiated under FS, UVA and VIS.

## References

### **Text S1. Fraction of photons absorbed by CDOM in the water column**

The fraction of photons absorbed by CDOM,  $Q_{a,CDOM}(\lambda)$  (mol photons  $m^{-2} d^{-1}$ ), in the euphotic zone at each station is calculated according to Equation S1:

$$Q_{a,CDOM}(\lambda) = Q(0, \lambda) \times R \times F(\lambda) \quad (S1)$$

where  $Q(0, \lambda)$  (mol photons  $m^{-2} d^{-1}$ ) is the monthly-averaged daily solar photon flux at the sea surface under clear-sky condition in the wavelength range of 290–600 nm over the PRE (22.5 °N) derived from the SMARTS2 model in January 2016;<sup>1,2</sup>  $R$  is the combination of two correction factors for light reflection by cloud (0.8) and at the air-water interface (0.93),<sup>3</sup> and  $F(\lambda)$  is the fraction of photons absorbed by CDOM at wavelength  $\lambda$  (nm). The wavelength-integrated  $Q_{a,CDOM}(\lambda)$  in UVB (290–320 nm), UVA (320–400 nm) and VIS (400–600 nm) ( $Q_{UVB}$ ,  $Q_{UVA}$ , and  $Q_{VIS}$ ) are then calculated for estimating the relative contributions of UVB, UVA and VIS to PT in main text Equation 2.

$F(\lambda)$ , in the euphotic zone was calculated using the following equation:

$$F(\lambda) = \frac{a_{CDOM}(\lambda)}{a_{CDOM}(\lambda) + a_p(\lambda) + a_w(\lambda)} \quad (S2)$$

where  $a_p(\lambda)$  ( $m^{-1}$ ) and  $a_w(\lambda)$  ( $m^{-1}$ ) denote the absorption coefficients of particles and pure water,<sup>4,5</sup> respectively.  $a_p(\lambda)$  was estimated from the suspended particulate matter (SPM) concentrations determined at the CDOM sampling stations in January 2016 (Sta. M01: 22.6 mg  $L^{-1}$ ; M08: 50.9 mg  $L^{-1}$ ; Sta. M10: 5.60 mg  $L^{-1}$ )<sup>6</sup> and the linear relationships between  $a_p(\lambda)$  and SPM (Figure S4A) established from the July 2013 data reported by Wang et al. (2014)<sup>7</sup>, assuming negligible seasonal and interannual variabilities in the established  $a_p(\lambda)$ -SPM relationships. The calculated  $a_p(\lambda)$  at Sta. M01, M08 and M10 decreases exponentially with increasing wavelength, following the function of  $y = a \times e^{(-bx)} + c$  ( $R^2 > 0.995$ ) (Figure S4B). Wang et al.'s  $a_p(\lambda)$  data were limited to the wavelength range of 350–600 nm<sup>7</sup>.  $a_p(\lambda)$  values from 290 to 349 nm were extrapolated from the regressed equation (Figure S4B).

### **Text S2. Modelling depth-resolved VIS-induced photoproduction of protein-like FDOM and CO<sub>2</sub> in the water column**

As CO<sub>2</sub> is the dominant product of DOC photomineralization,<sup>8-10</sup> CO<sub>2</sub> photoproduction is quantitatively equivalent to DOC photomineralization. The depth-

resolved monthly photoproduction rates of protein-like FDOM and CO<sub>2</sub> in January 2016 (sampling season in this study) are estimated for the shelf Sta. M10 using Equation S3:

$$P = AQY(VIS) \times \int_{400}^{600} Q(z, \lambda) \times a_{CDOM}(\lambda) d\lambda \quad (S3)$$

P denotes the photoproduction rate of protein-like FDOM (P<sub>PFDOM</sub>: R.U. L<sup>-1</sup> d<sup>-1</sup>) or CO<sub>2</sub> (P<sub>CO2</sub>: μmol L<sup>-1</sup> d<sup>-1</sup>), AQY(VIS) the broadband AQY(VIS) of protein-like FDOM photoproduction (AQY<sub>PFDOM</sub>(VIS)) or DOC photomineralization (AQY<sub>DOC</sub>(VIS)), and Q(z,λ) the spectral scalar photon flux at depth z (m) (mol photons m<sup>-2</sup> d<sup>-1</sup>), which is ~1.3 times the corresponding downwelling photon flux (Q<sub>d</sub>(z,λ)) (Gordon 1989), which is computed as follows:

$$Q_d(z, \lambda) = Q_d(0, \lambda) \times \exp(-K_d(\lambda) \times z) \quad (S4)$$

Q<sub>d</sub>(0,λ) is Q<sub>d</sub>(z,λ) at the air-sea interface (z = 0 m), approximately equal to Q(0,λ) in Equation S1, and K<sub>d</sub>(λ) is the diffusive attenuation coefficient (m<sup>-1</sup>) estimated according to Morel (1974)<sup>11</sup> and Vodacek et al.(1994)<sup>12</sup>. Vertical homogeneity is assumed for AQY(VIS), a<sub>CDOM</sub>(λ) and K<sub>d</sub>(λ), and no wavelength-dependence for AQY(VIS). The vertical profiles of the monthly P<sub>PFDOM</sub> and P<sub>CO2</sub> are shown in Figure S5.

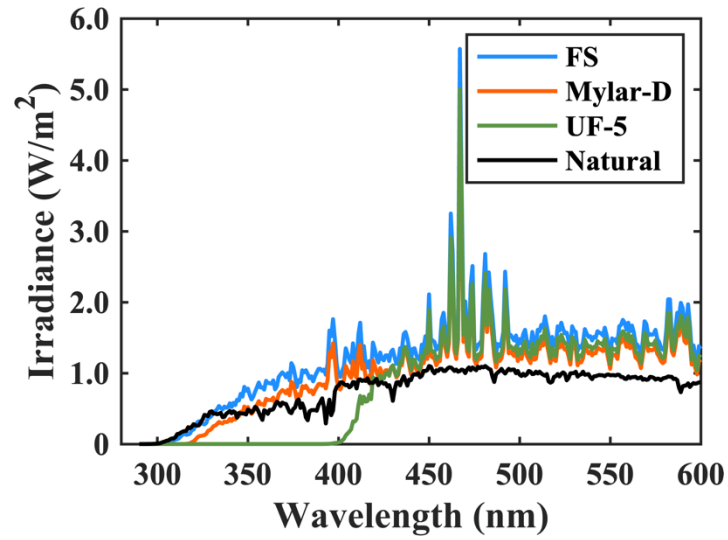

**Figure S1.** Measured spectral irradiances of the solar simulator for three light treatments: no extra light screening (i.e., full spectrum, FS), screened by the Mylar-D filter (UVB excluded), and screened by the UF-5 Plexiglas filter (both UVA and UVB excluded). Also shown is the monthly-averaged clear-sky noontime solar irradiance spectrum in January 2016 at 22.5°N derived from the SMARTS2 model.<sup>1,2</sup>

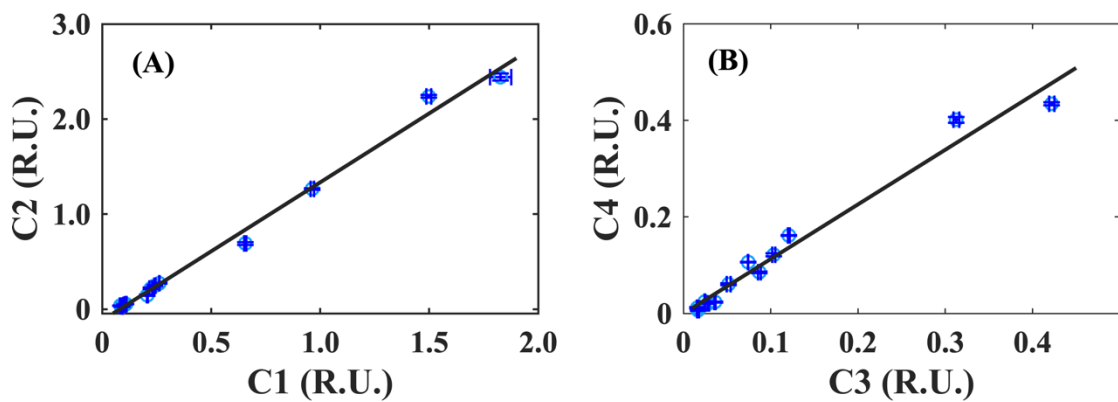

**Figure S2.** Plots of C2 versus C1 (A) and C4 versus C3 (B). The straight lines are the linear-regression lines, with the mathematical forms of  $C2 = 1.451C1 - 0.117$ ,  $R^2 = 0.992$ ,  $p < 0.01$ ;  $C4 = 1.132C3 - 0.00004$ ,  $R^2 = 0.973$ ,  $p < 0.05$ .

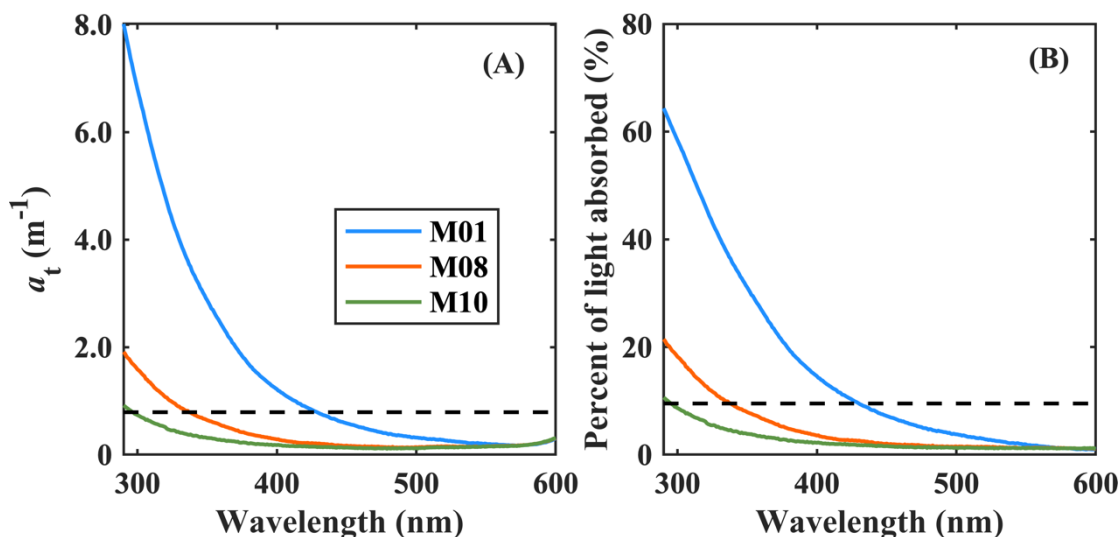

**Figure S3.**  $a_t$  (A) and percent of light absorbed by a sample (B) in the irradiation vessel as a function of wavelength for the original water samples. In panel A,  $a_t$  is the sum of the absorption coefficient of CDOM and pure water.<sup>4,5</sup> Based on Hu et al. (2002)<sup>13</sup>, we define the system as being optically thin when  $a_t \times L < 0.1$  ( $L$  is the light pathlength) and not optically thin when  $a_t \times L > 0.1$ . As the height of the quartz vessels (i.e.,  $L$ ) was 0.13 m, significant self-shading existed when  $a_t$  and the light absorption exceeded  $0.77 \text{ m}^{-1}$  and 9.5% (black dashed lines in panels A and B), respectively. Self-shading was significant at wavelengths  $< 428 \text{ nm}$  for the M01 sample,  $< 336 \text{ nm}$  for the M08 sample and  $< 296 \text{ nm}$  for the M10 sample. Self-shading should have decreased during irradiation due to CDOM photobleaching.

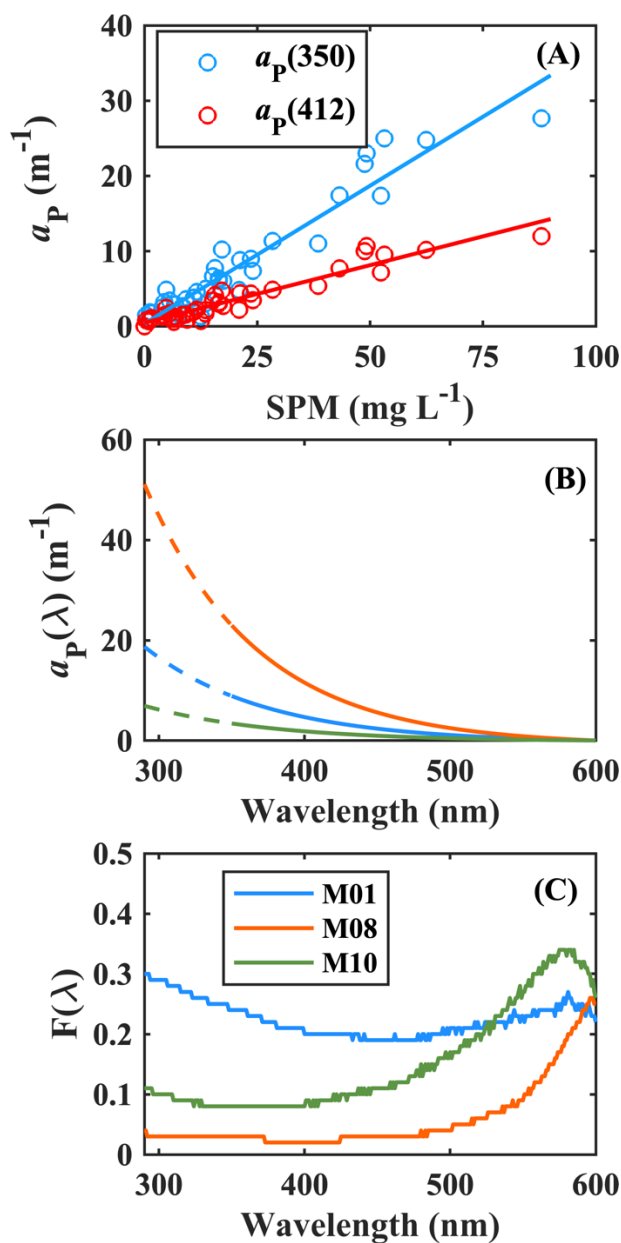

**Figure S4.** Typical absorption coefficients of particles versus SPM concentration based on samples collected in July 2013<sup>7</sup> (A); the retrieved absorption spectra of particles (B); and the calculated fraction of photons absorbed by CDOM (C) at Sta. M01, M08 and M10 in January 2016. In panel B: the dashed lines are the extrapolated values based on the regressed equations of  $a_p(\lambda)$  versus wavelength:  $a_p(\lambda) = 619.1 \times e^{(-0.01199\lambda)} - 0.416$  (M01);  $a_p(\lambda) = 2250 \times e^{(-0.01299\lambda)} - 0.895$  (M08);  $a_p(\lambda) = 1927 \times e^{(-0.01137\lambda)} - 0.175$  (M10). In panel C:  $F(\lambda)$  denotes the fraction of photons absorbed by CDOM within the wavelength range of 290–600 nm.

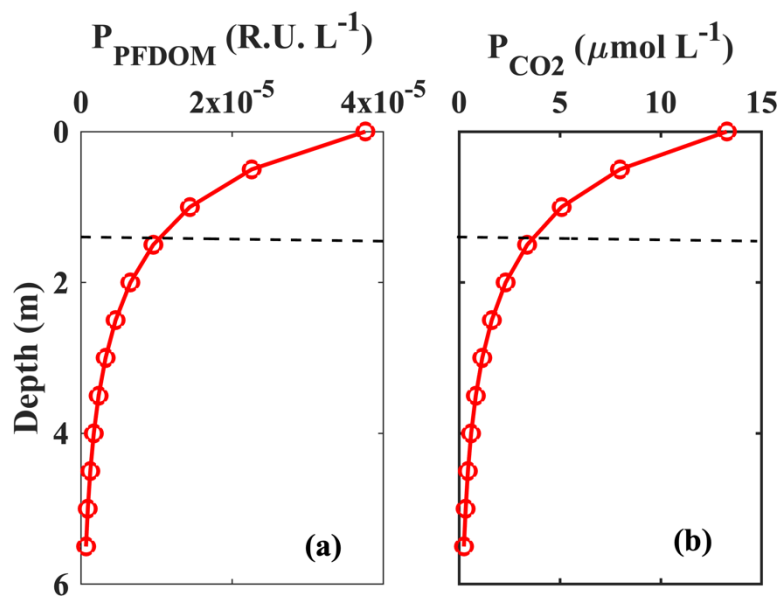

**Figure S5.** Modelled VIS-induced monthly photoproduction of protein-like FDOM (A) and CO<sub>2</sub> (B) in the water column in January 2016. The dashed horizontal line indicates the 1% UVA penetration depth (1.4 m).

**Table S1.** The input conditions for modelling the surface solar irradiance at 22.5°N in January 2016 over the PRE.

| Card ID  | Input                          | Remark                                                                                                                                                                                            |
|----------|--------------------------------|---------------------------------------------------------------------------------------------------------------------------------------------------------------------------------------------------|
| Card 1   | PRE201601                      | Title for current modelling                                                                                                                                                                       |
| Card 2   | 1                              | Pressure of the site                                                                                                                                                                              |
| Card 2a  | 1013.25, 0, 0                  | Pressure, altitude, height                                                                                                                                                                        |
| Card 3   | 1                              | Proper default atmosphere                                                                                                                                                                         |
| Card 3a  | STW                            | Sub-tropical winter                                                                                                                                                                               |
| Card 4   | 1                              | Default value for water vapor                                                                                                                                                                     |
| Card 5   | 1                              | Default value for zone abundance                                                                                                                                                                  |
| Card 6   | 1                              | Default values for all other gas abundances                                                                                                                                                       |
| Card 7   | 408                            | CO <sub>2</sub> concentration                                                                                                                                                                     |
| Card 7a  | 0                              | Synthetic spectrum recently proposed <sup>14</sup>                                                                                                                                                |
| Card 8   | S&F_MARIT                      | Aerosol model                                                                                                                                                                                     |
| Card 9   | 0                              | Turbidity selection                                                                                                                                                                               |
| Card 9a  | 0.084                          | Turbidity coefficient                                                                                                                                                                             |
| Card 10  | 2                              | Zonal albedo, 2 denotes water or calm ocean                                                                                                                                                       |
| Card 10b | 0                              | No correction for titled surface calculations                                                                                                                                                     |
| Card 11  | 280, 700, 1.034, 1367.0        | 280 and 700 are the minimum, maximum of the spectral range in nm, 1.034 is the correction factor of true sun-earth distance in January, 1367.0 is the selected solar constant (W/m <sup>2</sup> ) |
| Card 12  | 2                              | Spectral results are printed to file 17                                                                                                                                                           |
| Card 12a | 280, 700, 1.0                  | 280, 700 and 1.0 are the minimum, maximum and interval of the output solar spectrum in nm                                                                                                         |
| Card 12b | 5                              | Number of variables to print                                                                                                                                                                      |
| Card 12c | 2, 8, 9, 12, 38                | Selected output variables                                                                                                                                                                         |
| Card 13  | 0                              | No calculation of circumsolar radiation                                                                                                                                                           |
| Card 13a | 0, 0, 0                        | They are the slope angle, half aperture angle and limit angle and limit angle of the simulated radiometer (we chose default values here)                                                          |
| Card 14  | 0                              | No scanning/smoothing virtual filter of the postprocessor                                                                                                                                         |
| Card 15  | 0                              | No illuminance, luminous efficacy and PAR calculations                                                                                                                                            |
| Card 16  | 0                              | No special UV calculation                                                                                                                                                                         |
| Card 17  | 3                              | Inputs are year, month, day, hour, latitude, longitude and zone                                                                                                                                   |
| Card 17a | 2016, 1, 15, 5, 22.5, 113.5, 8 | One example of above parameters (Card 17)                                                                                                                                                         |

**Table S2.** *p* values of one-tailed t-tests for comparing the irradiated sample and the parallel dark control under FS, UVA+VIS and VIS.

|                          | M01    | M08    | M10    |
|--------------------------|--------|--------|--------|
| DOC                      |        |        |        |
| FS                       | < 0.01 | < 0.01 | < 0.01 |
| UVA+VIS                  | < 0.01 | < 0.01 | < 0.05 |
| VIS                      | < 0.01 | < 0.01 | < 0.05 |
| $a_{\text{CDOM}(330)}$   |        |        |        |
| FS                       | < 0.01 | < 0.01 | < 0.01 |
| UVA+VIS                  | < 0.01 | < 0.05 | < 0.05 |
| VIS                      | < 0.05 | > 0.05 | > 0.05 |
| $C_P$                    |        |        |        |
| FS                       | < 0.01 | < 0.01 | < 0.05 |
| UVA+VIS                  | < 0.01 | < 0.01 | < 0.05 |
| VIS                      | < 0.01 | < 0.01 | < 0.05 |
| $C_H$                    |        |        |        |
| FS                       | < 0.01 | < 0.01 | < 0.01 |
| UVA+VIS                  | < 0.01 | < 0.01 | < 0.05 |
| VIS                      | < 0.05 | > 0.05 | > 0.05 |
| $a^*_{\text{CDOM}(254)}$ |        |        |        |
| FS                       | < 0.01 | < 0.01 | < 0.01 |
| UVA+VIS                  | < 0.01 | < 0.05 | > 0.05 |
| VIS                      | < 0.01 | < 0.05 | > 0.05 |
| $S_{275-295}$            |        |        |        |
| FS                       | < 0.01 | < 0.01 | < 0.01 |
| UVA+VIS                  | < 0.05 | < 0.01 | < 0.05 |
| VIS                      | > 0.05 | > 0.05 | < 0.05 |
| $S_{300-600}$            |        |        |        |
| FS                       | < 0.01 | < 0.01 | < 0.01 |
| UVA+VIS                  | < 0.01 | < 0.01 | < 0.05 |
| VIS                      | < 0.01 | < 0.05 | < 0.05 |

**Table S3.**  $p$  values of two-tailed t-tests for comparing samples irradiated under FS, UVA+VIS and VIS.

|                          | M01 vs M08 | M08 vs M10 | M01 vs M10 |
|--------------------------|------------|------------|------------|
| DOC                      |            |            |            |
| FS                       | < 0.01     | > 0.05     | < 0.01     |
| UVA+VIS                  | < 0.01     | > 0.05     | < 0.01     |
| VIS                      | > 0.05     | > 0.05     | > 0.05     |
| $a_{\text{CDOM}(330)}$   |            |            |            |
| FS                       | < 0.01     | < 0.05     | < 0.01     |
| UVA+VIS                  | < 0.01     | < 0.05     | < 0.01     |
| VIS                      | > 0.05     | > 0.05     | > 0.05     |
| $C_p$                    |            |            |            |
| FS                       | < 0.01     | < 0.01     | < 0.01     |
| UVA+VIS                  | < 0.01     | > 0.05     | < 0.01     |
| VIS                      | < 0.01     | < 0.01     | < 0.01     |
| $C_H$                    |            |            |            |
| FS                       | < 0.01     | < 0.01     | < 0.01     |
| UVA+VIS                  | < 0.01     | < 0.05     | < 0.01     |
| VIS                      | > 0.05     | > 0.05     | > 0.05     |
| $a^*_{\text{CDOM}(254)}$ |            |            |            |
| FS                       | < 0.01     | > 0.05     | < 0.01     |
| UVA+VIS                  | < 0.05     | > 0.05     | < 0.01     |
| VIS                      | > 0.05     | > 0.05     | < 0.05     |
| $S_{275-295}$            |            |            |            |
| FS                       | < 0.01     | > 0.05     | < 0.05     |
| UVA+VIS                  | < 0.05     | > 0.05     | > 0.05     |
| VIS                      | < 0.05     | < 0.05     | < 0.05     |
| $S_{300-600}$            |            |            |            |
| FS                       | < 0.01     | < 0.01     | < 0.01     |
| UVA+VIS                  | > 0.05     | < 0.05     | < 0.05     |
| VIS                      | > 0.05     | > 0.05     | > 0.05     |

**Table S4.** *p* values of two-tailed t-tests for comparing samples irradiated under FS, UVA and VIS.

| Light treatment | M01 vs M08 | M08 vs M10 | M01 vs M10 |
|-----------------|------------|------------|------------|
| $AQY_{DOC}$     |            |            |            |
| FS              | > 0.05     | > 0.05     | > 0.05     |
| UVA             | < 0.05     | > 0.05     | > 0.05     |
| VIS             | > 0.05     | > 0.05     | > 0.05     |
| $AQY_{CDOM}$    |            |            |            |
| FS              | > 0.05     | > 0.05     | > 0.05     |
| UVA             | > 0.05     | > 0.05     | > 0.05     |
| VIS             | > 0.05     | > 0.05     | > 0.05     |
| $AQY_{PFDOM}$   |            |            |            |
| FS              | < 0.05     | < 0.01     | < 0.01     |
| UVA             | < 0.01     | > 0.05     | < 0.01     |
| VIS             | < 0.01     | < 0.05     | < 0.01     |
| $AQY_{HFDOM}$   |            |            |            |
| FS              | > 0.05     | < 0.05     | < 0.01     |
| UVA             | > 0.05     | > 0.05     | < 0.01     |
| VIS             | > 0.05     | > 0.05     | > 0.05     |

## References:

- 1 C. Gueymard, SMARTS (version 2.9.5), SMARTS, A Simple Model of the Atmospheric Radiative Transfer of Sunshine: Algorithms and Performance Assessment. *Professional Paper FSEC-PF-270-95*, Florida Solar Energy Center, FL, 1995.
- 2 C. Gueymard, Parameterized Transmittance Model for Direct Beam and Circumsolar Spectral Irradiance, *Solar Energy*, 2001, **71**(5), 325–346.
- 3 A. Stubbins, G. Uher, C. S. Law, K. Mopper, C. Robinson, and R. C. Upstill-Goddard, Open-ocean carbon monoxide photoproduction, *Deep-Sea Res. PT II*, 2006, **53**, 1695–1705.
- 4 H. Buiteveld, J. M. H. Hakvoort, and M. Donze, The optical properties of pure water, *Proc. SPIE*, 1994, **2258**, Ocean Opt. XII., 174–183.
- 5 R. M. Pope, and E. S. Fry, Absorption spectrum (380–700 nm) of pure water. II. Integrating cavity measurements, *Appl. Opt.*, 1997, **36**(33), 8710–8723.
- 6 R. Li, J. Xu, X. Li, Z. Shi, and P. J. Harrison, Spatiotemporal variability in phosphorus species in the Pearl River estuary: Influence of the river discharge, *Sci. Rep.*, 2017, **7**, 13649, doi:10.1038/s41598-017-13924-w
- 7 S. Wang, Y. Wang, Q. Fu, B. Yin, and Y. Li, Spectral absorption properties of the water constituents in the estuary of Zhujiang River, *Environ.Sci.* 2014, **35**(12), 4511–4521. (in Chinese)
- 11 C. Hu, F. E. Muller-Karger, and R. G. Zepp, Absorbance, absorption coefficient, and apparent quantum yield: A comment on common ambiguity in the use of these optical concepts, *Limnol. Oceanogr.*, 2002, **47**(4), 1261–1267.

- 8 W. L. Miller, and M. A. Moran, Interaction of photochemical and microbial processes in the degradation of refractory dissolved organic matter from a coastal marine environment, *Limnol. Oceanogr.*, 1997, **42**(6), 1317–1324.
- 9 E. M. White, D. J. Kieber, J. Sherrard, W. L. Miller, and K. Mopper, Carbon dioxide and carbon monoxide photoproduction quantum yields in the Delaware estuary, *Mar. Chem.*, 2010, **118**, 11–21.
- 10 A. Morel, Optical properties of pure water and pure seawater, in *Optical Aspects of Oceanography*, ed. N. G. Jerlov, and E. S. Nielsen, Academic Press, New York, 1974, chapter 1, pp. 1–24.
- 12 A. Vodacek, S. A. Green, and N. V. Blough, An experimental model of the solar-stimulated fluorescence of chromophoric dissolved organic matter, *Limnol. Oceanogr.*, 1994, **39**(1), 1–11.
- 13 S. Buckley, F. Leresche, K. Norris, and F. L. Rosario-Ortiz, Role of direct and sensitized photolysis in the photomineralization of dissolved organic matter and model chromophores to carbon dioxide, *Environ. Sci. Technol.*, 2024, **58**(31), 13808–13819.
- 14 C. Gueymard, The sun's total and spectral irradiance for solar energy applications and solar radiation models, *Sol. Energy*, 2004, **76**, 423–453.
